# Supplementary material for: Sequencing of SARS-CoV-2 RNA Fragments in Wastewater Detects the Spread of New Variants during Major Events
Source: MDPI journal article supplement (doi:10.3390/microorganisms11112660), 2023-10-30
Supplement: s1 [file s1]

## Supplementary Materials

**Table S1.** Number of WEF 2023 participants per region and country of origin.

|        |                 |                                  |     |          |                    |                            |     |
|--------|-----------------|----------------------------------|-----|----------|--------------------|----------------------------|-----|
| Africa | North Africa    | Algeria                          | 1   | Americas | Caribbean          | Dominican Republic         | 1   |
|        |                 | Egypt                            | 5   |          |                    | Grenada                    | 1   |
|        |                 | Morocco                          | 10  |          |                    | Jamaica                    | 1   |
|        |                 | Sudan                            | 2   |          |                    | Trinidad and Tobago        | 1   |
|        |                 | Tunisia                          | 2   |          | Central America    | Costa Rica                 | 5   |
|        | Eastern Africa  | Ethiopia                         | 2   |          |                    | El Salvador                | 2   |
|        |                 | Kenya                            | 11  |          |                    | Guatemala                  | 3   |
|        |                 | Mauritius                        | 1   |          |                    | Honduras                   | 2   |
|        |                 | Mozambique                       | 2   |          |                    | Mexico                     | 15  |
|        |                 | Rwanda                           | 5   |          |                    | Panama                     | 1   |
|        |                 | Uganda                           | 1   |          | South America      | Argentina                  | 7   |
|        |                 | Tanzania                         | 5   |          |                    | Brazil                     | 47  |
|        |                 | Zambia                           | 5   |          |                    | Chile                      | 6   |
|        |                 | Zimbabwe                         | 6   |          |                    | Colombia                   | 13  |
|        | Middle Africa   | Angola                           | 3   |          |                    | Ecuador                    | 6   |
|        |                 | Chad                             | 1   |          |                    | Paraguay                   | 1   |
|        |                 | Democratic Republic of the Congo | 2   |          |                    | Peru                       | 5   |
|        | Southern Africa | Botswana                         | 2   |          |                    | Uruguay                    | 1   |
|        |                 | South Africa                     | 50  |          |                    | Venezuela                  | 2   |
|        | Western Africa  | Benin                            | 1   |          | Northern America   | Bermuda                    | 1   |
|        |                 | Ivory Coast                      | 1   |          |                    | Canada                     | 39  |
|        |                 | Ghana                            | 3   |          |                    | USA                        | 721 |
|        |                 | Niger                            | 2   | Asia     | Central Asia       | Kazakhstan                 | 2   |
|        |                 | Nigeria                          | 14  |          | Eastern Asia       | People's Republic of China | 38  |
|        |                 | Senegal                          | 1   |          |                    | Hong Kong SAR, China       | 28  |
|        |                 | Togo                             | 1   |          |                    | Taiwan, China              | 2   |
| Europe | Eastern Europe  | Belarus                          | 1   |          |                    | Republic of Korea          | 36  |
|        |                 | Bulgaria                         | 3   |          |                    | Japan                      | 80  |
|        |                 | Czech Republic                   | 5   |          | South-eastern Asia | Cambodia                   | 1   |
|        |                 | Hungary                          | 1   |          |                    | Indonesia                  | 16  |
|        |                 | Poland                           | 6   |          |                    | Malaysia                   | 10  |
|        |                 | Moldova                          | 1   |          |                    | Myanmar                    | 2   |
|        |                 | Romania                          | 1   |          |                    | Philippines                | 18  |
|        |                 | Russian Federation               | 1   |          |                    | Singapore                  | 38  |
|        |                 | Slovakia                         | 3   |          |                    | Thailand                   | 16  |
|        |                 | Ukraine                          | 10  |          |                    | Timor-Leste                | 2   |
|        | Northern Europe | Denmark                          | 25  |          |                    | Viet Nam                   | 3   |
|        |                 | Estonia                          | 1   |          | Southern Asia      | Bangladesh                 | 4   |
|        |                 | Finland                          | 7   |          |                    | Bhutan                     | 1   |
|        |                 | Ireland                          | 8   |          |                    | India                      | 95  |
|        |                 | Latvia                           | 2   |          |                    | Iran                       | 1   |
|        |                 | Lithuania                        | 4   |          |                    | Nepal                      | 3   |
|        |                 | Norway                           | 29  |          |                    | Pakistan                   | 12  |
|        |                 | Sweden                           | 26  |          |                    | Sri Lanka                  | 1   |
|        |                 | United Kingdom                   | 236 |          | Western Asia       | Azerbaijan                 | 7   |
|        | Southern Europe | Albania                          | 2   |          |                    | Bahrain                    | 11  |
|        |                 | Croatia                          | 2   |          |                    | Cyprus                     | 2   |
|        |                 | Greece                           | 5   |          |                    | Georgia                    | 4   |
|        |                 | Italy                            | 24  |          |                    | Iraq                       | 4   |
|        |                 | Malta                            | 1   |          |                    | Israel                     | 11  |
|        |                 | Montenegro                       | 1   |          |                    | Jordan                     | 7   |
|        |                 | Republic of North Macedonia      | 1   |          |                    | Kuwait                     | 14  |
|        |                 | Portugal                         | 8   |          |                    | Lebanon                    | 2   |
|        |                 | Serbia                           | 2   |          |                    | Oman                       | 2   |
|        |                 | Slovenia                         | 2   |          |                    | Qatar                      | 10  |
|        |                 | Spain                            | 23  |          |                    | Saudi Arabia               | 46  |
|        | Western Europe  | Austria                          | 10  |          |                    | Palestinian Territories    | 4   |
|        |                 | Belgium                          | 25  |          |                    | Türkiye                    | 14  |
|        |                 | France                           | 70  |          |                    | United Arab Emirates       | 75  |
|        |                 | Germany                          | 119 | Oceania  | Australia/         | Australia                  | 16  |
|        |                 | Liechtenstein                    | 4   |          | New Zealand        | New Zealand                | 2   |
|        |                 | Luxembourg                       | 5   |          | Melanesia          | Fiji                       | 1   |
|        |                 | Monaco                           | 1   |          |                    |                            |     |
|        |                 | Netherlands                      | 58  |          |                    |                            |     |
|        |                 | Switzerland                      | 259 |          |                    |                            |     |

**Table S2:** Point estimates with upper and lower 95% confidence intervals (CI) for Davos 2021

| Davos 2021     | date       | B.1.1.7     | B.1.351     | B.1.617.1   | B.1.617.2   | BA.1        | BA.2        | P.1         | undetermined |
|----------------|------------|-------------|-------------|-------------|-------------|-------------|-------------|-------------|--------------|
| Point estimate | 05/11/2021 | 0.028447596 | 0.002367789 | 0.044378929 | 0.838073406 | 0.021142663 | 0.00450093  | 0.002589447 | 0.058499241  |
|                | 12/11/2021 | 0.034517818 | 0.005381831 | 0.042535976 | 0.817203742 | 0.030626931 | 0.005485472 | 0.003010871 | 0.061237358  |
|                | 19/11/2021 | 0.037569153 | 0.007979925 | 0.040458999 | 0.805056391 | 0.0379927   | 0.006038136 | 0.003210812 | 0.061693885  |
|                | 26/11/2021 | 0.038844425 | 0.010240886 | 0.038212863 | 0.797531197 | 0.044685699 | 0.006345157 | 0.003279762 | 0.060860012  |
|                | 02/12/2021 | 0.042070247 | 0.01264437  | 0.035425329 | 0.783854476 | 0.054415511 | 0.006952458 | 0.003482966 | 0.061154643  |
|                | 03/12/2021 | 0.035760849 | 0.012981501 | 0.03091814  | 0.786881635 | 0.065875311 | 0.006227259 | 0.003262151 | 0.058093154  |
|                | 05/12/2021 | 0.021790816 | 0.012122647 | 0.027263961 | 0.809485101 | 0.071938031 | 0.004402682 | 0.003092111 | 0.049904651  |
|                | 07/12/2021 | 0.006840902 | 0.010227613 | 0.023629141 | 0.831081534 | 0.085339793 | 0.002737025 | 0.002743548 | 0.037400442  |
|                | 09/12/2021 | 0.002526307 | 0.00846591  | 0.021464631 | 0.813074086 | 0.117352361 | 0.00293074  | 0.002723708 | 0.031462257  |
|                | 10/12/2021 | 0.003254512 | 0.006738624 | 0.019895302 | 0.767229959 | 0.167151039 | 0.003674964 | 0.002742249 | 0.02931335   |
|                | 12/12/2021 | 0.00458344  | 0.004891258 | 0.017585908 | 0.706838708 | 0.234582916 | 0.003915962 | 0.002623576 | 0.024978232  |
|                | 14/12/2021 | 0.00731957  | 0.003401118 | 0.013918778 | 0.614988128 | 0.338424419 | 0.003599427 | 0.001885549 | 0.016463012  |
|                | 19/12/2021 | 0.010106208 | 0.0018141   | 0.010151216 | 0.521662391 | 0.444222528 | 0.003324702 | 0.001011918 | 0.007706938  |
|                | 21/12/2021 | 0.012952014 | 0.000176431 | 0.006319963 | 0.424566468 | 0.552975557 | 0.002954192 | 5.53753E-05 | 0            |
|                | 23/12/2021 | 0.015840963 | 0           | 0.002447136 | 0.318757264 | 0.660533193 | 0.002421444 | 0           | 0            |
| Upper 95% CI   | 05/11/2021 | 0.036326476 | 0.022812516 | 0.12095502  | 0.906957282 | 0.030045205 | 0.02256225  | 0.00859992  | 0.135244632  |
|                | 12/11/2021 | 0.043968501 | 0.030702046 | 0.109729255 | 0.880281605 | 0.04030897  | 0.027450052 | 0.007924917 | 0.120163106  |
|                | 19/11/2021 | 0.04775245  | 0.035288332 | 0.089328347 | 0.859633618 | 0.04805454  | 0.030180385 | 0.007096781 | 0.104909447  |
|                | 26/11/2021 | 0.049283845 | 0.037935311 | 0.079637208 | 0.84031491  | 0.05553788  | 0.031707813 | 0.006889482 | 0.093297437  |
|                | 02/12/2021 | 0.053358265 | 0.043437967 | 0.070466732 | 0.82537084  | 0.067604522 | 0.034375197 | 0.007530133 | 0.089731333  |
|                | 03/12/2021 | 0.045118034 | 0.039702714 | 0.058104905 | 0.829260668 | 0.081435612 | 0.030509348 | 0.007119719 | 0.093259869  |
|                | 05/12/2021 | 0.027240871 | 0.029310781 | 0.058140912 | 0.849002425 | 0.085625983 | 0.019243291 | 0.010967004 | 0.093384111  |
|                | 07/12/2021 | 0.011613012 | 0.024708446 | 0.055968016 | 0.872910813 | 0.097276536 | 0.006402613 | 0.008845622 | 0.082216981  |
|                | 09/12/2021 | 0.008977753 | 0.022449403 | 0.058443001 | 0.860592504 | 0.137770544 | 0.007270914 | 0.008794982 | 0.076830257  |
|                | 10/12/2021 | 0.010698073 | 0.016959362 | 0.054094142 | 0.81812068  | 0.192174696 | 0.009553159 | 0.009004741 | 0.076077639  |
|                | 12/12/2021 | 0.014174675 | 0.012882521 | 0.04653713  | 0.757435851 | 0.267296623 | 0.011013488 | 0.008764563 | 0.066059634  |
|                | 14/12/2021 | 0.023736209 | 0.009800132 | 0.033379735 | 0.655562123 | 0.37715767  | 0.010037493 | 0.006359558 | 0.044330894  |
|                | 19/12/2021 | 0.034983037 | 0.00614494  | 0.024410781 | 0.565555465 | 0.48824034  | 0.009642878 | 0.003477888 | 0.023932565  |
|                | 21/12/2021 | 0.048699503 | 0.002208943 | 0.021727128 | 0.482932063 | 0.602010933 | 0.008965501 | 0.000299651 | 0.013343888  |
|                | 23/12/2021 | 0.064122169 | 0.001364505 | 0.020367393 | 0.408954319 | 0.724121861 | 0.010213639 | 4.69408E-05 | 0.006327927  |
| Lower 95% CI   | 05/11/2021 | 0.021846857 | 0           | 0.001843377 | 0.689529172 | 0.013647124 | 0.000245544 | 0.00029866  | 0.023015054  |
|                | 12/11/2021 | 0.026630332 | 0           | 0.0062561   | 0.704922853 | 0.022220643 | 0.000490881 | 0.000370185 | 0.032532057  |
|                | 19/11/2021 | 0.028919919 | 0.001100764 | 0.009513795 | 0.716339763 | 0.029524026 | 0.000674115 | 0.000473157 | 0.03820874   |
|                | 26/11/2021 | 0.029854802 | 0.001718249 | 0.011421383 | 0.731231657 | 0.035050512 | 0.000861127 | 0.000464706 | 0.042253784  |
|                | 02/12/2021 | 0.032359734 | 0.002401696 | 0.012505179 | 0.738864766 | 0.043140442 | 0.000837237 | 0.000490109 | 0.042580517  |
|                | 03/12/2021 | 0.02725256  | 0.002563578 | 0.010571314 | 0.74688758  | 0.054117151 | 0.000699856 | 0.000594637 | 0.037009383  |
|                | 05/12/2021 | 0.016213389 | 0.002823563 | 0.007449077 | 0.765244829 | 0.061636525 | 0.000716351 | 0.000461642 | 0.024405091  |
|                | 07/12/2021 | 0.004412856 | 0.001693717 | 0.005156799 | 0.780829048 | 0.07147969  | 0.000509409 | 0.000261062 | 0.008998655  |
|                | 09/12/2021 | 0.000147919 | 0.000969291 | 0.005264786 | 0.757926814 | 0.098652859 | 0.000231335 | 0.000120014 | 0.002763311  |
|                | 10/12/2021 | 0.000156827 | 0.000623646 | 0.003817669 | 0.711865697 | 0.146588133 | 0.000271445 | 9.35152E-05 | 0.001252146  |
|                | 12/12/2021 | 0.000290534 | 0.000374688 | 0.002700134 | 0.65666618  | 0.210761849 | 0.000245657 | 7.97641E-05 | 0.000128341  |
|                | 14/12/2021 | 0.000379538 | 0.00017656  | 0.00161226  | 0.57614371  | 0.309299661 | 0.000269886 | 5.47303E-05 | 5.15254E-05  |
|                | 19/12/2021 | 0.000115144 | 0           | 0.000550479 | 0.474677426 | 0.402292193 | 4.79199E-05 | 2.03867E-05 | 0            |
|                | 21/12/2021 | 0           | 0           | 0           | 0.372021827 | 0.501532979 | 0           | 0           | 0            |
|                | 23/12/2021 | 0           | 0           | 0           | 0.259139376 | 0.599354394 | 0           | 0           | 0            |

**Table S3:** Point estimates with upper and lower 95% confidence intervals (CI) for Landquart 2021

| Landquart 2021 | date       | B.1.1.7     | B.1.351     | B.1.617.1   | B.1.617.2   | BA.1        | BA.2        | P.1         | undetermined |
|----------------|------------|-------------|-------------|-------------|-------------|-------------|-------------|-------------|--------------|
| Point estimate | 05/11/2021 | 1.89989E-05 | 0.010466189 | 0           | 0.977948457 | 0           | 0           | 0           | 0.011566355  |
|                | 12/11/2021 | 0.000541828 | 0.008518234 | 0.087833549 | 0.855253321 | 0.00228179  | 0.000800299 | 0.000491591 | 0.044279389  |
|                | 19/11/2021 | 0.068933663 | 0.017456626 | 0.129401596 | 0.578171924 | 0.071524115 | 0.010910436 | 0.010723736 | 0.112877903  |
|                | 26/11/2021 | 0.102355065 | 0.02504963  | 0.098653086 | 0.51375962  | 0.104102579 | 0.015425057 | 0.015458485 | 0.125196477  |
|                | 10/12/2021 | 0.068461597 | 0.023178738 | 0.036012786 | 0.706071909 | 0.068553968 | 0.010042496 | 0.01016812  | 0.077510387  |
|                | 23/12/2021 | 0           | 0.007244851 | 0.016687035 | 0.976068114 | 0           | 0           | 0           | 0            |
| Upper 95% CI   | 05/11/2021 | 0.000464043 | 0.032409955 | 0.0456059   | 1           | 0.000517686 | 0.000485317 | 0.000148101 | 0.058569059  |
|                | 12/11/2021 | 0.001351626 | 0.026047031 | 0.182664921 | 0.955872129 | 0.002450305 | 0.002629931 | 0.001781611 | 0.140702912  |
|                | 19/11/2021 | 0.088884559 | 0.067558145 | 0.277938153 | 0.698979443 | 0.089706604 | 0.056842333 | 0.055429422 | 0.253508585  |
|                | 26/11/2021 | 0.132553098 | 0.10109208  | 0.227986562 | 0.627524587 | 0.133560877 | 0.084412284 | 0.082442989 | 0.225036082  |
|                | 10/12/2021 | 0.088723292 | 0.073798136 | 0.077196188 | 0.755788175 | 0.08892811  | 0.055974353 | 0.055071482 | 0.106637564  |
|                | 23/12/2021 | 0           | 0.029300838 | 0.083216188 | 1           | 0           | 0.000109351 | 4.71507E-05 | 0.039321407  |
| Lower 95% CI   | 05/11/2021 | 0           | 0.000194263 | 0           | 0.898412569 | 0           | 0           | 0           | 0            |
|                | 12/11/2021 | 6.70136E-05 | 0.000495579 | 0.013183847 | 0.717674775 | 7.094E-05   | 4.19746E-05 | 3.20719E-05 | 0.003860322  |
|                | 19/11/2021 | 0.048173639 | 0.001749863 | 0.02151538  | 0.423912614 | 0.048105945 | 0.001099741 | 0.0010605   | 0.06492774   |
|                | 26/11/2021 | 0.071256146 | 0.002745553 | 0.01564885  | 0.416317326 | 0.071443068 | 0.001431991 | 0.001268937 | 0.086349913  |
|                | 10/12/2021 | 0.047580769 | 0.00227526  | 0.006197404 | 0.662794945 | 0.047895934 | 0.000772508 | 0.000766073 | 0.0548665    |
|                | 23/12/2021 | 0           | 0           | 0           | 0.98001646  | 0           | 0           | 0           | 0            |

**Table S4:** Point estimates with upper and lower 95% confidence intervals (CI) for Lostallo 2021

| Lostallo 2021  | date       | B.1.1.7     | B.1.351     | B.1.617.1   | B.1.617.2   | BA.1        | BA.2        | P.1         | undetermined |
|----------------|------------|-------------|-------------|-------------|-------------|-------------|-------------|-------------|--------------|
| Point estimate | 05/11/2021 | 9.01175E-05 | 0.000283894 | 0.037182934 | 0.936549433 | 0.000220608 | 0.000379037 | 0.000281442 | 0.025012534  |
|                | 19/11/2021 | 0.00030839  | 0.000230512 | 0.021028984 | 0.961457566 | 0.00028498  | 0.00036481  | 0.000332096 | 0.015992662  |
|                | 26/11/2021 | 0.000410209 | 0.000344391 | 0.018928887 | 0.960937542 | 0.000416163 | 0.000328987 | 0.000303872 | 0.01832995   |
|                | 03/12/2021 | 0.000495044 | 0.00064798  | 0.02598627  | 0.938997268 | 0.000570437 | 0.000266133 | 0.000326362 | 0.032710508  |
|                | 10/12/2021 | 0.000452172 | 0.000717792 | 0.028634148 | 0.931013549 | 0.000858459 | 0.000319463 | 0.000401556 | 0.037602862  |
|                | 23/12/2021 | 0.000422994 | 0.000523291 | 0.022429937 | 0.949913596 | 0.00140717  | 0.000408842 | 0.000360037 | 0.024534132  |
| Upper 95% CI   | 05/11/2021 | 0.000317524 | 0.000659595 | 0.136550321 | 0.991395612 | 0.000717152 | 0.00097347  | 0.000984039 | 0.06572646   |
|                | 19/11/2021 | 0.000798518 | 0.000445909 | 0.059639444 | 0.989459564 | 0.000687435 | 0.000750521 | 0.000892957 | 0.042410625  |
|                | 26/11/2021 | 0.001084369 | 0.000735887 | 0.043716515 | 0.988121548 | 0.000893344 | 0.000630913 | 0.000751229 | 0.04630467   |
|                | 03/12/2021 | 0.001075653 | 0.001545132 | 0.068225991 | 0.984939774 | 0.001107613 | 0.000594311 | 0.000700237 | 0.078464791  |
|                | 10/12/2021 | 0.001066541 | 0.001925247 | 0.07188288  | 0.980430834 | 0.001710738 | 0.000667094 | 0.000848264 | 0.098345777  |
|                | 23/12/2021 | 0.000840261 | 0.001294626 | 0.065362853 | 0.991030159 | 0.00374193  | 0.001290449 | 0.000870272 | 0.083195901  |
| Lower 95% CI   | 05/11/2021 | 0           | 0           | 0.002471801 | 0.806399698 | 0           | 4.06631E-05 | 1.59713E-05 | 0.00237007   |
|                | 19/11/2021 | 9.17114E-05 | 5.65275E-05 | 0.003964809 | 0.915205526 | 5.93317E-05 | 0.000104512 | 6.11364E-05 | 0.003730224  |
|                | 26/11/2021 | 0.000111631 | 5.31E-05    | 0.003782043 | 0.917050411 | 0.000106888 | 0.000104341 | 9.23847E-05 | 0.00465947   |
|                | 03/12/2021 | 0.000153961 | 0.000134006 | 0.004631282 | 0.869960271 | 0.000181425 | 7.02673E-05 | 7.71539E-05 | 0.004200971  |
|                | 10/12/2021 | 0.000127296 | 0.000188594 | 0.006146682 | 0.84644328  | 0.000266095 | 9.65081E-05 | 0.000102427 | 0.005692646  |
|                | 23/12/2021 | 8.16785E-05 | 1.00702E-05 | 0           | 0.887474378 | 0.000252282 | 7.62296E-06 | 1.85263E-05 | 0.00048678   |

**Table S5: Point estimates with upper and lower 95% confidence intervals (CI) for S-chanf 2021**

| S-chanf 2021   | date       | B.1.1.7     | B.1.351     | B.1.617.1   | B.1.617.2   | BA.1        | BA.2        | P.1         | undetermined |
|----------------|------------|-------------|-------------|-------------|-------------|-------------|-------------|-------------|--------------|
| Point estimate | 05/11/2021 | 0.026211437 | 0.007078053 | 0.039007927 | 0.854382844 | 0.01160081  | 0.004695118 | 0.003616846 | 0.053406964  |
|                | 12/11/2021 | 0.032121434 | 0.009889064 | 0.041718711 | 0.821803906 | 0.024612982 | 0.006185777 | 0.004403434 | 0.05926469   |
|                | 19/11/2021 | 0.035239769 | 0.011829214 | 0.043124016 | 0.799308342 | 0.036511427 | 0.007194602 | 0.004819881 | 0.06197275   |
|                | 26/11/2021 | 0.03673544  | 0.013175004 | 0.044035047 | 0.781330805 | 0.048695953 | 0.007962529 | 0.005017929 | 0.063047294  |
|                | 02/12/2021 | 0.040093051 | 0.014914052 | 0.045224523 | 0.755184273 | 0.064351314 | 0.009167283 | 0.005447451 | 0.065618053  |
|                | 03/12/2021 | 0.034554972 | 0.013435792 | 0.041017324 | 0.76412656  | 0.076168547 | 0.008844654 | 0.004644271 | 0.057207879  |
|                | 05/12/2021 | 0.021847632 | 0.009606395 | 0.033047631 | 0.806311913 | 0.078300997 | 0.007071621 | 0.002871896 | 0.040941914  |
|                | 07/12/2021 | 0.008687813 | 0.004943212 | 0.024938417 | 0.840463105 | 0.087735181 | 0.005664039 | 0.000964316 | 0.026603918  |
|                | 09/12/2021 | 0.007202727 | 0.003185584 | 0.020572806 | 0.819317876 | 0.112668611 | 0.006649223 | 0.000395313 | 0.03000786   |
|                | 10/12/2021 | 0.01101418  | 0.003716414 | 0.019665567 | 0.771101331 | 0.144170537 | 0.007856202 | 0.000473226 | 0.042002543  |
|                | 12/12/2021 | 0.014058873 | 0.004823697 | 0.018064056 | 0.718288523 | 0.187706362 | 0.007886549 | 0.000568187 | 0.048603753  |
|                | 14/12/2021 | 0.01547288  | 0.005669377 | 0.015635935 | 0.647306371 | 0.262080995 | 0.006966199 | 0.000635651 | 0.046232592  |
|                | 19/12/2021 | 0.01707022  | 0.006609734 | 0.013467474 | 0.573877952 | 0.336850163 | 0.006132848 | 0.00070035  | 0.045291259  |
|                | 21/12/2021 | 0.018597255 | 0.007684878 | 0.011595324 | 0.498152137 | 0.414216667 | 0.005127462 | 0.000770314 | 0.043855964  |
|                | 23/12/2021 | 0.019762784 | 0.008691415 | 0.009793505 | 0.420501725 | 0.496158585 | 0.003883277 | 0.000835752 | 0.040372957  |
| Upper 95% CI   | 05/11/2021 | 0.034438235 | 0.026669631 | 0.111402188 | 0.906167573 | 0.022178887 | 0.022466163 | 0.019291624 | 0.094354256  |
|                | 12/11/2021 | 0.04201803  | 0.033152689 | 0.103959555 | 0.872357869 | 0.035270691 | 0.027179753 | 0.02334603  | 0.10061208   |
|                | 19/11/2021 | 0.045823884 | 0.036577947 | 0.094766931 | 0.848709672 | 0.047057554 | 0.029875135 | 0.025372578 | 0.099941092  |
|                | 26/11/2021 | 0.047872323 | 0.038525707 | 0.099221767 | 0.829804608 | 0.060810862 | 0.031809726 | 0.026199173 | 0.098866487  |
|                | 02/12/2021 | 0.052929207 | 0.042084056 | 0.100168054 | 0.804915348 | 0.081377148 | 0.035499443 | 0.028332052 | 0.103633259  |
|                | 03/12/2021 | 0.04714876  | 0.03585966  | 0.087280092 | 0.807520875 | 0.097175654 | 0.03191468  | 0.0238402   | 0.091332036  |
|                | 05/12/2021 | 0.03299157  | 0.02282544  | 0.070655044 | 0.845560877 | 0.099783508 | 0.020562585 | 0.014090966 | 0.070737762  |
|                | 07/12/2021 | 0.0165164   | 0.012716457 | 0.051282228 | 0.874733462 | 0.116497525 | 0.01384968  | 0.003597902 | 0.05100189   |
|                | 09/12/2021 | 0.016973162 | 0.008302498 | 0.045633842 | 0.859378613 | 0.141091361 | 0.017019991 | 0.00087358  | 0.053904959  |
|                | 10/12/2021 | 0.026722277 | 0.012258424 | 0.045996202 | 0.819603122 | 0.179983255 | 0.024204187 | 0.000962351 | 0.076180012  |
|                | 12/12/2021 | 0.033206024 | 0.019595804 | 0.051941315 | 0.781119267 | 0.229722432 | 0.027504846 | 0.001680904 | 0.101842768  |
|                | 14/12/2021 | 0.035678042 | 0.022330592 | 0.047142724 | 0.716735569 | 0.306647164 | 0.024143818 | 0.001910602 | 0.101378443  |
|                | 19/12/2021 | 0.039655314 | 0.025299275 | 0.042122241 | 0.66689641  | 0.400374603 | 0.021990562 | 0.002043987 | 0.111674833  |
|                | 21/12/2021 | 0.047722812 | 0.030644178 | 0.044550094 | 0.608722712 | 0.498042596 | 0.02078314  | 0.002074827 | 0.122803864  |
|                | 23/12/2021 | 0.058179477 | 0.037108886 | 0.043439814 | 0.548670102 | 0.600022993 | 0.01781495  | 0.002383413 | 0.114127374  |
| Lower 95% CI   | 05/11/2021 | 0.018718393 | 0           | 0.006305674 | 0.776434175 | 0.000692362 | 0           | 0.000277268 | 0.028616249  |
|                | 12/11/2021 | 0.02282339  | 0.000743687 | 0.008353307 | 0.761740174 | 0.013616255 | 0           | 0.000379291 | 0.033907823  |
|                | 19/11/2021 | 0.024810267 | 0.001200091 | 0.010081888 | 0.739976262 | 0.026408629 | 0.000792188 | 0.000456871 | 0.037995222  |
|                | 26/11/2021 | 0.025612274 | 0.001267846 | 0.011776034 | 0.724004704 | 0.037658498 | 0.001078909 | 0.000535733 | 0.038551024  |
|                | 02/12/2021 | 0.027727011 | 0.00139462  | 0.013102408 | 0.698352321 | 0.048886296 | 0.001212431 | 0.000626043 | 0.038649405  |
|                | 03/12/2021 | 0.023407525 | 0.001425585 | 0.012529278 | 0.706474537 | 0.057538219 | 0.001139717 | 0.000597822 | 0.032918998  |
|                | 05/12/2021 | 0.014065354 | 0.001051942 | 0.010325085 | 0.759223431 | 0.057648252 | 0.000932618 | 0.000449023 | 0.020759801  |
|                | 07/12/2021 | 0.004314597 | 0.000728251 | 0.007607464 | 0.803907303 | 0.06131995  | 0.000673751 | 0.000266099 | 0.009619714  |
|                | 09/12/2021 | 0.00100356  | 0.000702428 | 0.005070733 | 0.784700979 | 0.079410894 | 0.000376183 | 0.000128198 | 0.006617776  |
|                | 10/12/2021 | 0.001517305 | 0.000527439 | 0.003282451 | 0.720671784 | 0.101819814 | 0.000500118 | 0.000126459 | 0.004857329  |
|                | 12/12/2021 | 0.002022951 | 0.000342561 | 0.0025634   | 0.641409859 | 0.136829079 | 0.000321858 | 7.61691E-05 | 0.004798925  |
|                | 14/12/2021 | 0.002155044 | 0.000371448 | 0.002470235 | 0.575650903 | 0.208262962 | 0.000232379 | 5.9682E-05  | 0.003664537  |
|                | 19/12/2021 | 0.000939226 | 0.000154391 | 0.000711599 | 0.490707378 | 0.26462123  | 5.4258E-05  | 1.9171E-05  | 0.001018577  |
|                | 21/12/2021 | 6.5411E-05  | 0           | 0           | 0.399039467 | 0.32251368  | 0           | 0           | 0            |
|                | 23/12/2021 | 0           | 0           | 0           | 0.305809549 | 0.373544377 | 0           | 0           | 0            |

**Table S6:** Point estimates with upper and lower 95% confidence intervals (CI) for Davos 2022

| Davos 2022     | date       | B.1.1.7     | BA.1        | BA.2        | BA.2.75     | BA.4        | BA.5        | undetermined |
|----------------|------------|-------------|-------------|-------------|-------------|-------------|-------------|--------------|
| Point estimate | 15/05/2022 | 0.000344358 | 0.000699301 | 0.373318031 | 9.85E-05    | 0.001933598 | 0.62322031  | 0.000385947  |
|                | 19/05/2022 | 0.000518685 | 0.000115433 | 0.392309868 | 0.000382461 | 0.004076389 | 0.602324032 | 0.000273132  |
|                | 22/05/2022 | 0.000517789 | 0.000105935 | 0.457002912 | 0.000698641 | 0.002545871 | 0.538806443 | 0.00032241   |
|                | 24/05/2022 | 0.000472823 | 0.000148563 | 0.444845094 | 0.000727144 | 0.002938521 | 0.55043106  | 0.000436795  |
|                | 26/05/2022 | 0.000442192 | 0.000340138 | 0.346227575 | 0.000667817 | 0.011710025 | 0.640101612 | 0.000510642  |
|                | 29/05/2022 | 0.000367648 | 0.000416119 | 0.31169061  | 0.000436307 | 0.009155776 | 0.677270162 | 0.000663377  |
| Upper 95% CI   | 15/05/2022 | 0.000944989 | 0.002584754 | 0.42337054  | 0.000310396 | 0.001718008 | 0.637734864 | 0.001329112  |
|                | 19/05/2022 | 0.001102252 | 0.000578555 | 0.417100839 | 0.001151177 | 0.011594178 | 0.631760879 | 0.001077523  |
|                | 22/05/2022 | 0.001089342 | 0.000652254 | 0.467301784 | 0.00262995  | 0.002397859 | 0.550568662 | 0.001164212  |
|                | 24/05/2022 | 0.00108171  | 0.000761413 | 0.462653722 | 0.002844134 | 0.002780944 | 0.583708066 | 0.001281134  |
|                | 26/05/2022 | 0.001089016 | 0.001071937 | 0.373245867 | 0.002431261 | 0.05443433  | 0.653129861 | 0.00137731   |
|                | 29/05/2022 | 0.001196228 | 0.001334861 | 0.324346719 | 0.001258815 | 0.029072975 | 0.691224578 | 0.001638023  |
| Lower 95% CI   | 15/05/2022 | 1.45E-11    | 8.54E-22    | 0.360238782 | 5.95E-14    | 3.23E-34    | 0.575701413 | 8.98E-20     |
|                | 19/05/2022 | 1.55E-05    | 4.07E-21    | 0.361938606 | 1.14E-05    | 1.03E-24    | 0.579514058 | 8.28E-19     |
|                | 22/05/2022 | 8.82E-06    | 1.53E-24    | 0.437679086 | 1.73E-05    | 1.61E-31    | 0.530464514 | 2.10E-16     |
|                | 24/05/2022 | 4.86E-06    | 1.88E-22    | 0.413005542 | 1.92E-06    | 4.86E-25    | 0.533804022 | 5.92E-20     |
|                | 26/05/2022 | 5.41E-05    | 6.73E-18    | 0.321604091 | 1.11E-05    | 0.003046795 | 0.619931312 | 6.63E-13     |
|                | 29/05/2022 | 1.45E-05    | 5.44E-17    | 0.291886403 | 6.13E-07    | 0.001421247 | 0.671687997 | 1.01E-11     |

**Table S7:** Point estimates with upper and lower 95% confidence intervals (CI) for S-chanf 2022

| S-chanf 2022   | date       | B.1.1.7     | BA.1        | BA.2        | BA.2.75     | BA.4        | BA.5        | undetermined |
|----------------|------------|-------------|-------------|-------------|-------------|-------------|-------------|--------------|
| Point estimate | 15/05/2022 | 0.00024356  | 0.000385889 | 0.983136469 | 0.000845071 | 0.006418389 | 0.008326704 | 0.000643918  |
|                | 19/05/2022 | 0.000254764 | 0.000547458 | 0.637776023 | 0.000873411 | 0.003174132 | 0.356390615 | 0.000983597  |
|                | 22/05/2022 | 0.000271836 | 0.000285199 | 0.647658879 | 0.000843472 | 0.003206047 | 0.346989949 | 0.000744617  |
|                | 24/05/2022 | 0.000249723 | 9.46E-05    | 0.646993457 | 0.00081681  | 0.003259796 | 0.347911593 | 0.000674039  |
|                | 26/05/2022 | 0.000232938 | 4.01E-05    | 0.595135906 | 0.000825841 | 0.003548373 | 0.399530176 | 0.000686698  |
|                | 29/05/2022 | 0.000208333 | 1.38E-05    | 0.40495019  | 0.000865321 | 0.009780664 | 0.583315584 | 0.000866136  |
| Upper 95% CI   | 15/05/2022 | 0.000940543 | 0.001471603 | 0.994160616 | 0.003337874 | 0.007686983 | 0.01330372  | 0.001658553  |
|                | 19/05/2022 | 0.001116522 | 0.001512111 | 0.654083565 | 0.00353963  | 5.56E-05    | 0.361493872 | 0.001922123  |
|                | 22/05/2022 | 0.001048268 | 0.000837037 | 0.675905563 | 0.003420735 | 0.000162323 | 0.358795044 | 0.001633715  |
|                | 24/05/2022 | 0.000974695 | 0.000471781 | 0.675764292 | 0.003366461 | 0.000690836 | 0.359874364 | 0.001549355  |
|                | 26/05/2022 | 0.000944444 | 0.000360978 | 0.654446848 | 0.003397596 | 0.003640898 | 0.43674252  | 0.001547191  |
|                | 29/05/2022 | 0.001006044 | 0.00013397  | 0.484648132 | 0.003600573 | 0.030140954 | 0.617313047 | 0.001890724  |
| Lower 95% CI   | 15/05/2022 | 3.34E-13    | 6.16E-16    | 0.981836978 | 3.27E-06    | 7.92E-21    | 0.003013487 | 3.28E-13     |
|                | 19/05/2022 | 5.16E-07    | 5.63E-17    | 0.634538773 | 3.16E-06    | 1.59E-23    | 0.343847728 | 5.88E-10     |
|                | 22/05/2022 | 1.37E-08    | 4.21E-19    | 0.638463924 | 8.78E-08    | 3.38E-37    | 0.322026986 | 6.24E-10     |
|                | 24/05/2022 | 5.33E-12    | 8.91E-27    | 0.636498452 | 9.21E-09    | 3.10E-38    | 0.323392084 | 3.69E-11     |
|                | 26/05/2022 | 1.58E-09    | 8.90E-29    | 0.558976946 | 1.77E-08    | 1.80E-38    | 0.343293654 | 5.78E-15     |
|                | 29/05/2022 | 8.91E-09    | 4.78E-24    | 0.365876679 | 3.68E-07    | 1.06E-25    | 0.502233236 | 4.00E-09     |

**Table S8:** Point estimates with upper and lower 95% confidence intervals (CI) for Davos 2023

| Davos 2023     | date       | BA.2.75     | BA.5        | BQ.1.1      | XBB         | XBB.1.16    | XBB.1.5     | XBB.1.9     | undetermined |
|----------------|------------|-------------|-------------|-------------|-------------|-------------|-------------|-------------|--------------|
| Point estimate | 12/01/2023 | 0.000230169 | 0.113007084 | 0.000315163 | 0.216537069 | 0.000855895 | 0.431516962 | 0.200901425 | 0.036636233  |
|                | 15/01/2023 | 0.002464405 | 0.024096953 | 0.001096552 | 0.274655815 | 0.008530515 | 0.515699197 | 0.151599572 | 0.02185699   |
|                | 17/01/2023 | 0.038339777 | 0.003454989 | 0.002584829 | 0.29422457  | 0.013335362 | 0.541296737 | 0.061915232 | 0.044848503  |
|                | 20/01/2023 | 0.308072014 | 0.006288268 | 0.003217171 | 0.223190193 | 0.002474282 | 0.348454737 | 0.00413054  | 0.104172795  |
|                | 22/01/2023 | 0.440092243 | 0.014683608 | 0.002620435 | 0.228158344 | 0.001989779 | 0.204599797 | 0.000696571 | 0.107159221  |
|                | 24/01/2023 | 0.381707906 | 0.009251489 | 0.002553874 | 0.276042539 | 0.002404758 | 0.221359505 | 0.003230415 | 0.103449514  |
| Upper 95% CI   | 12/01/2023 | 0.003761042 | 0.821816535 | 0.001708297 | 0.942040968 | 0.005792595 | 0.982411862 | 0.499698984 | 0.511547564  |
|                | 15/01/2023 | 0.026825323 | 0.175177414 | 0.003810971 | 0.990246137 | 0.094124005 | 0.99100359  | 0.492210677 | 0.217477492  |
|                | 17/01/2023 | 0.490985562 | 0.017667833 | 0.006938036 | 0.99244281  | 0.189730132 | 0.992057197 | 0.202131769 | 0.486360861  |
|                | 20/01/2023 | 0.991632576 | 0.014098983 | 0.007617754 | 0.990811382 | 0.00688301  | 0.991110797 | 0.005539514 | 0.976498342  |
|                | 22/01/2023 | 0.993654194 | 0.021138235 | 0.006706212 | 0.987198306 | 0.006112312 | 0.987847574 | 0.002628828 | 0.981105406  |
|                | 24/01/2023 | 0.991150986 | 0.059563075 | 0.006677866 | 0.987678775 | 0.007308523 | 0.980392694 | 0.003010552 | 0.976423942  |
| Lower 95% CI   | 12/01/2023 | 5.31E-35    | 0.000531007 | 7.33E-34    | 1.77E-25    | 4.74E-22    | 1.77E-16    | 0.000255392 | 9.06E-34     |
|                | 15/01/2023 | 4.56E-27    | 1.03E-11    | 6.09E-19    | 4.28E-23    | 9.50E-11    | 4.14E-17    | 0.000685523 | 2.08E-25     |
|                | 17/01/2023 | 5.15E-18    | 1.99E-16    | 0.000424485 | 2.24E-25    | 9.63E-05    | 5.36E-18    | 0.000560736 | 4.19E-22     |
|                | 20/01/2023 | 0.00131104  | 5.03E-20    | 0.000774068 | 3.09E-26    | 0.000366381 | 5.63E-21    | 2.54E-19    | 1.28E-22     |
|                | 22/01/2023 | 0.001433565 | 1.68E-17    | 0.000608953 | 4.05E-28    | 0.000311035 | 1.12E-22    | 4.04E-17    | 4.77E-22     |
|                | 24/01/2023 | 0.001230013 | 5.27E-11    | 0.000476459 | 6.18E-31    | 0.000259136 | 5.88E-22    | 1.23E-21    | 2.57E-26     |

**Table S9:** Point estimates with upper and lower 95% confidence intervals (CI) for S-chanf 2023

| S-chanf 2023   | date       | BA.2.75     | BA.5        | BQ.1.1      | XBB         | XBB.1.16    | XBB.1.5     | XBB.1.9     | undetermined |
|----------------|------------|-------------|-------------|-------------|-------------|-------------|-------------|-------------|--------------|
| Point estimate | 12/01/2023 | 0.000503581 | 0.008389914 | 1.92E-05    | 0.409840759 | 0.000234664 | 0.558322704 | 0.010482853 | 0.012206342  |
|                | 15/01/2023 | 0.011580625 | 0.001604177 | 9.79E-05    | 0.243263237 | 0.002641907 | 0.707369481 | 0.026443743 | 0.006998929  |
|                | 17/01/2023 | 0.022402374 | 0.001177471 | 0.000130621 | 0.246615745 | 0.001140909 | 0.710348312 | 0.011756301 | 0.006428267  |
|                | 20/01/2023 | 0.016664474 | 0.000784096 | 7.69E-05    | 0.242007346 | 0.000221536 | 0.720976203 | 0.008591297 | 0.010678194  |
|                | 22/01/2023 | 0.011900794 | 0.000683992 | 2.51E-05    | 0.242407111 | 7.35E-05    | 0.730664323 | 0.00840499  | 0.005840185  |
|                | 24/01/2023 | 0.000863384 | 0.000699741 | 8.45E-06    | 0.247960958 | 2.49E-05    | 0.741282645 | 0.008350653 | 0.000809246  |
| Upper 95% CI   | 12/01/2023 | 0.005448676 | 0.023880216 | 0.000147129 | 0.501231921 | 0.002258673 | 0.96497031  | 0.008179823 | 0.060236529  |
|                | 15/01/2023 | 0.03651653  | 0.006093644 | 0.000673113 | 0.499179426 | 0.012788454 | 0.995769026 | 0.138747582 | 0.021901849  |
|                | 17/01/2023 | 0.275878789 | 0.004430494 | 0.00058389  | 0.50282695  | 0.005104968 | 0.997900193 | 0.015860425 | 0.008578317  |
|                | 20/01/2023 | 0.029530385 | 0.003281992 | 0.000360332 | 0.499750538 | 0.000668027 | 0.997860099 | 0.001297169 | 0.005569348  |
|                | 22/01/2023 | 0.014175756 | 0.003024095 | 0.000175888 | 0.499782823 | 0.000202627 | 0.998840628 | 0.000311049 | 0.005175852  |
|                | 24/01/2023 | 0.004548461 | 0.002636947 | 6.49E-05    | 0.500694924 | 9.09E-05    | 0.999268919 | 0.000150284 | 0.00468377   |
| Lower 95% CI   | 12/01/2023 | 1.14E-36    | 1.83E-06    | 3.75E-37    | 0.017026241 | 9.11E-07    | 0.330863405 | 1.92E-05    | 1.17E-34     |
|                | 15/01/2023 | 2.70E-33    | 5.34E-06    | 7.53E-36    | 2.74E-05    | 6.01E-06    | 0.447240311 | 2.81E-06    | 2.12E-35     |
|                | 17/01/2023 | 4.50E-26    | 1.38E-05    | 1.48E-26    | 3.79E-11    | 1.25E-05    | 0.373778963 | 8.32E-06    | 5.27E-27     |
|                | 20/01/2023 | 1.11E-15    | 5.39E-06    | 6.72E-24    | 1.80E-22    | 1.34E-05    | 0.403559305 | 7.16E-06    | 1.30E-23     |
|                | 22/01/2023 | 5.03E-25    | 3.63E-06    | 1.54E-26    | 1.13E-28    | 7.11E-06    | 0.479401339 | 5.65E-06    | 5.51E-25     |
|                | 24/01/2023 | 6.96E-39    | 1.53E-06    | 4.94E-31    | 1.50E-29    | 2.04E-06    | 0.493520318 | 6.22E-06    | 1.60E-30     |

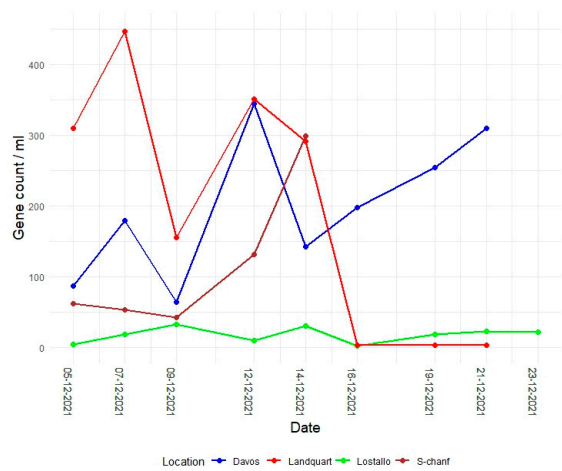

**Figure S1.** qPCR results of the wastewater samples testing for SARS-CoV-2 including Omicron in December 2021 in Davos (blue), Landquart (red), Lostallo (green) and S-chanf (brown).

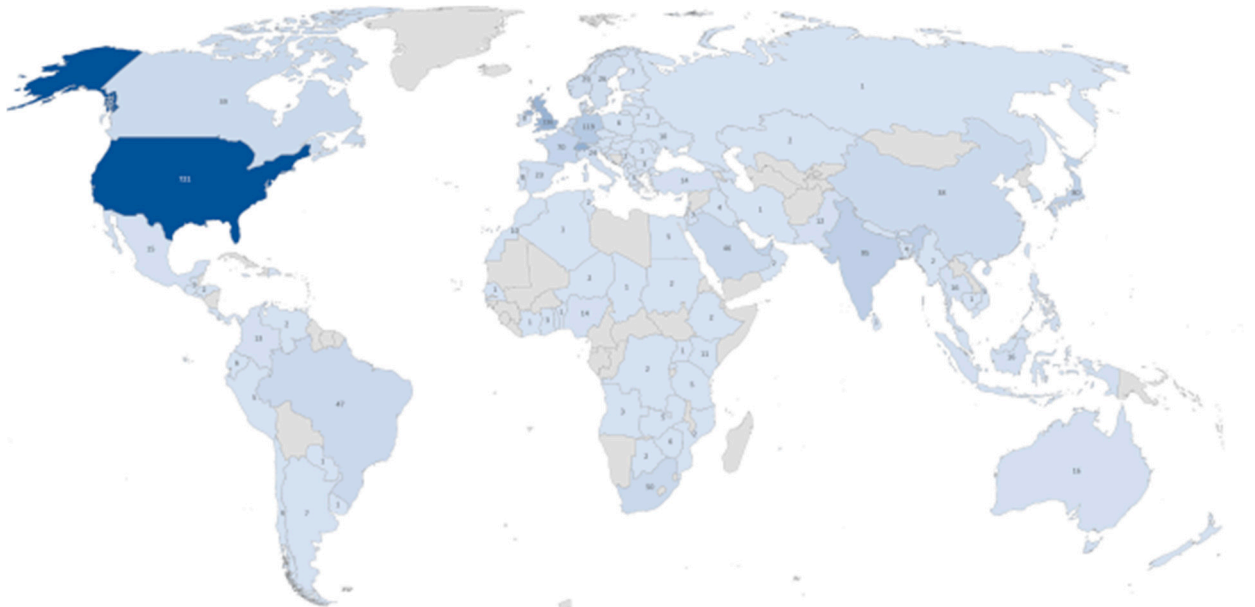

@Australian Bureau of Statistics, GeoNames, Geospatial Data Edit, Microsoft Crowdsourced Enrichments, Navinfo, OpenStreetMap, TomTom, Wikipedia, Zenrin

**Figure S2.** Number of WEF 2023 participants per country of origin; in blue the countries with participants, the darker blue, the more participants.
